# Supplementary material for: Numerical modeling of stresses and deformation in the Zagros–Iranian Plateau region
Source: Copernicus journal article supplement (doi:10.5194/se-14-937-2023), 2023-08-30
Supplement: Supplementary file 1 [file se-14-937-2023-supplement.pdf]

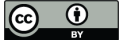

*Supplement of*

## **Numerical modeling of stresses and deformation in the Zagros–Iranian Plateau region**

**Srishti Singh and Radheshyam Yadav**

*Correspondence to:* Radheshyam Yadav ([shamgpbhu@gmail.com](mailto:shamgpbhu@gmail.com))

The copyright of individual parts of the supplement might differ from the article licence.

# Supplement

## Contents of this file

- Figures S1 to S3
- Tables S1 to S2

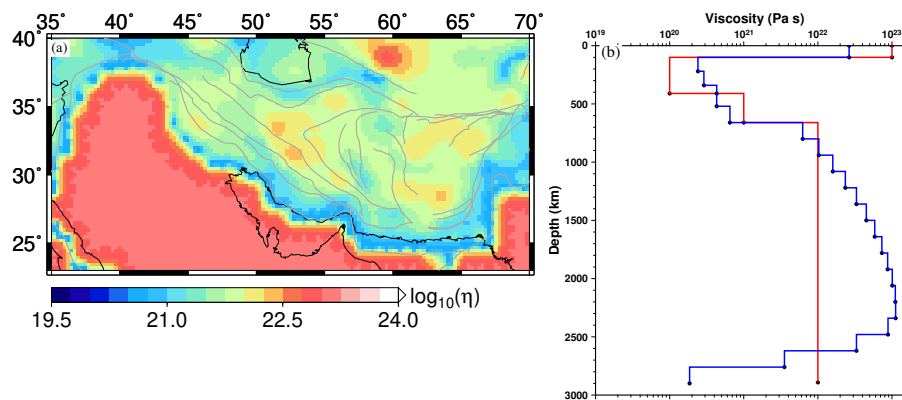

**Figure S1.** (Left) Plot of lithospheric viscosity in the study region that is used in finite element models. Right panel shows GHW13(red) (Ghosh et al., 2013) and SH08 (blue) (Steinberger and Holme, 2008) viscosity structures used in mantle convection models.

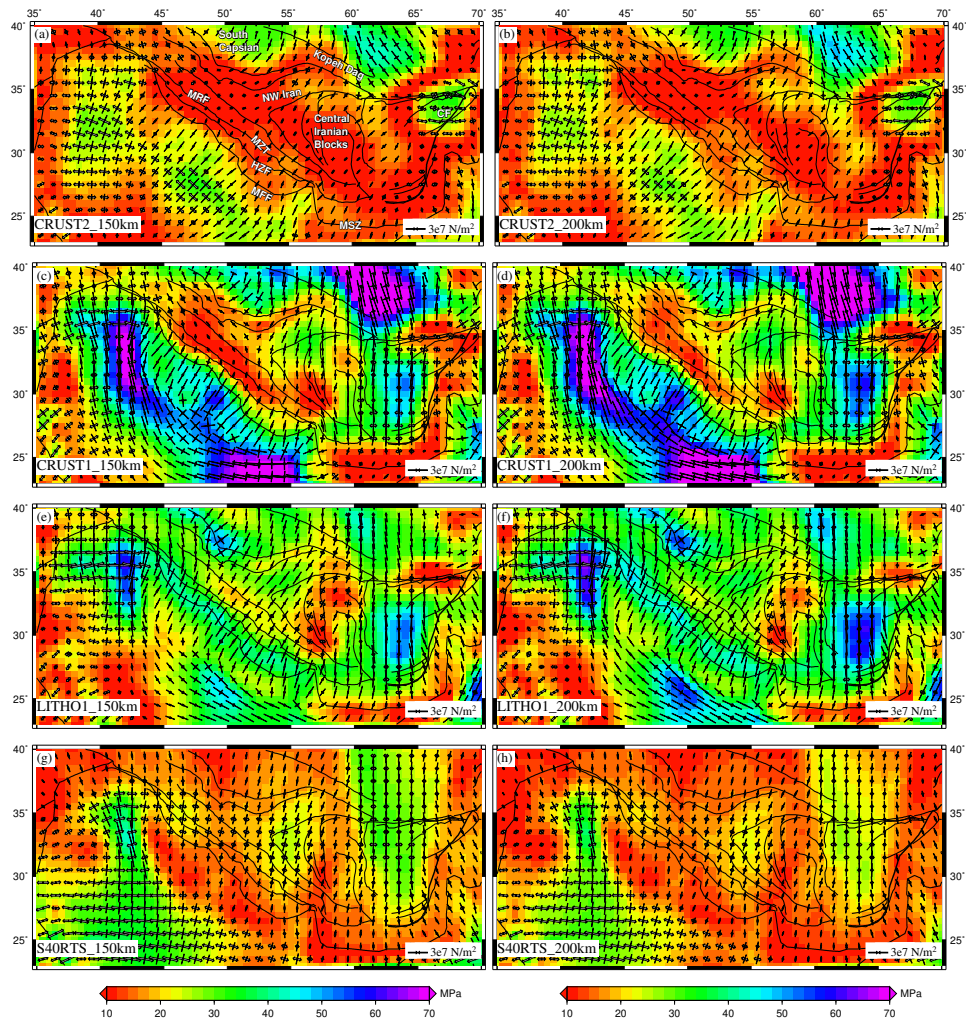

**Figure S2.** (a-f) Deviatoric stresses predicted using GPE models for lithosphere base at 150 km (left) and 200 km (right). (g-h) Mantle derived stresses from S4ORTS tomography model for GHW13 viscosity structures, when LAB is at 150 km (left) and 200 km (right). The background plot shows the second invariant of deviatoric stresses. The white arrows denote tensional stresses, and black arrows indicate compressional stresses.

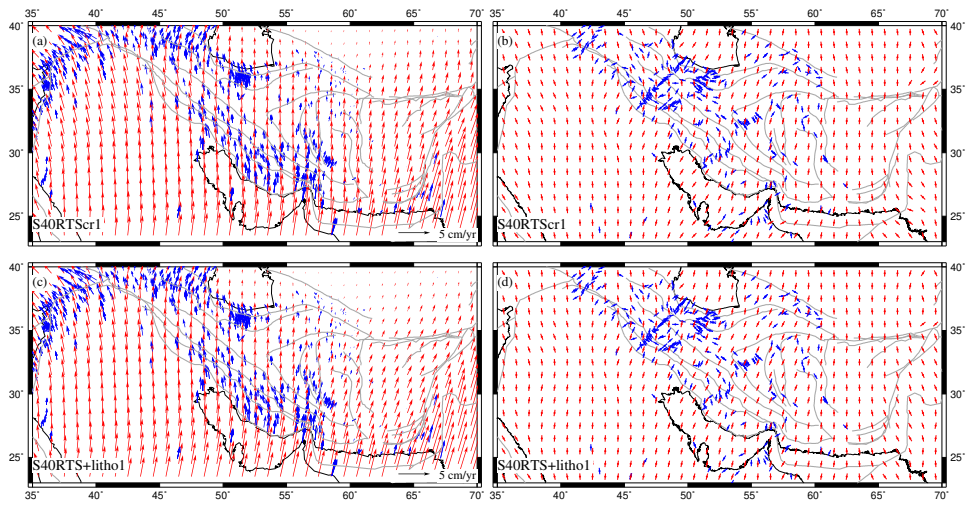

**Figure S3.** (Left Panel) GPS (blue) and predicted (red) plate velocities with respect to a fixed Eurasian plate. Right Panel shows plot of FPDs in blue and  $S_{Hmax}$  in red.

**Table S1.** Summary of quantitative comparison of predicted results of various models with observed data for SH08 viscosity model (Steinberger and Holme, 2008).

| <b>Model</b>             | $S_{Hmax}$ | <b>misfit</b> | <b>Strain rate correlation</b> | <b>RMS error (mm/yr)</b> | <b>Angular misfit</b> | <b>Total error</b> |
|--------------------------|------------|---------------|--------------------------------|--------------------------|-----------------------|--------------------|
| S40RTS+SH08              | 0.58       |               | 0.90                           | 5.68                     | 6.00                  | 2.42               |
| SAW642AN+SH08            | 0.58       |               | 0.88                           | 17.41                    | 22.00                 | 3.56               |
| 3D2018_S40RTS+SH08       | 0.58       |               | 0.88                           | 8.68                     | 9.20                  | 2.86               |
| S2.9_S363+SH08           | 0.54       |               | 0.89                           | 10.38                    | 14.00                 | 2.99               |
| S40RTS+SH08cr2           | 0.52       |               | 0.91                           | 3.81                     | 3.30                  | 1.95               |
| SAW642AN+SH08cr2         | 0.56       |               | 0.89                           | 5.38                     | 5.10                  | 2.35               |
| 3D2018_S40RTS+SH08cr2    | 0.54       |               | 0.89                           | 4.15                     | 3.30                  | 2.07               |
| S2.9_S362+SH08cr2        | 0.52       |               | 0.92                           | 5.14                     | 5.80                  | 2.24               |
| S40RTS+SH08cr1           | 0.54       |               | 0.92                           | 4.80                     | 6.10                  | 2.19               |
| SAW642AN+SH08cr1         | 0.54       |               | 0.91                           | 8.61                     | 10.70                 | 2.78               |
| 3D2018_S40RTS+SH08cr1    | 0.56       |               | 0.91                           | 6.30                     | 7.90                  | 2.49               |
| S2.9_S362+SH08cr1        | 0.55       |               | 0.91                           | 5.82                     | 7.60                  | 2.40               |
| S40RTS+SH08+litho        | 0.52       |               | 0.94                           | 5.79                     | 7.40                  | 2.34               |
| SAW642AN+SH08+litho      | 0.51       |               | 0.94                           | 8.05                     | 8.70                  | 2.66               |
| 3D2018_S40RTS+SH08+litho | 0.53       |               | 0.94                           | 6.61                     | 8.20                  | 2.48               |
| S2.9_S362+SH08+litho     | 0.53       |               | 0.94                           | 7.61                     | 10.10                 | 2.62               |

| Model/LAB Depth | $S_{Hmax}$ error |        |        | Strain Rates Correlation |        |        | Velocity rms error |        |        |
|-----------------|------------------|--------|--------|--------------------------|--------|--------|--------------------|--------|--------|
|                 | 100 km           | 150 km | 200 km | 100 km                   | 150 km | 200 km | 100 km             | 150 km | 200 km |
| CRUST2          | 0.77             | 0.64   | 0.60   | 0.69                     | 0.83   | 0.87   | 7.32               | 5.85   | 5.69   |
| CRUST1          | 0.64             | 0.61   | 0.60   | 0.87                     | 0.9    | 0.9    | 7.44               | 8.59   | 9.28   |
| LITHO1          | 0.59             | 0.56   | 0.56   | 0.92                     | 0.93   | 0.93   | 8.51               | 9.03   | 9.45   |
| S40RTS          | 0.57             | 0.56   | 0.54   | 0.88                     | 0.89   | 0.90   | 6.20               | 5.90   | 6.06   |
| S40RTScr2       | 0.48             | 0.48   | 0.49   | 0.92                     | 0.92   | 0.93   | 3.28               | 5.24   | 3.82   |
| S40RTScr1       | 0.51             | 0.52   | 0.53   | 0.92                     | 0.92   | 0.92   | 4.29               | 9.60   | 9.28   |
| S40RTS+litho1   | 0.49             | 0.50   | 0.51   | 0.93                     | 0.93   | 0.94   | 4.52               | 9.03   | 9.45   |

**Table S2.** Quantitative comparison of fit to the observed data for varying LAB depths.

## References

- 5 Ghosh, A., Holt, W. E., and Wen, L.: Predicting the lithospheric stress field and plate motions by joint modeling of lithosphere and mantle dynamics, *Journal of Geophysical Research: Solid Earth*, 118, 346–368, 2013.
- Steinberger, B. and Holme, R.: Mantle flow models with core-mantle boundary constraints and chemical heterogeneities in the lowermost mantle, *Journal of Geophysical Research: Solid Earth*, 113, <https://doi.org/10.1029/2007JB005080>, 2008.
